# Supplementary material for: Rancidity Estimation of Perilla Seed Oil by Using Near-Infrared Spectroscopy and Multivariate Analysis Techniques
Source: Hindawi journal article supplement (doi:10.1155/2017/1082612), 2017-01-01
Supplement: f2 [file 1082612.f2.docx]

**Rancidity Estimation of Perilla Seed Oil by using Near-Infrared Spectroscopy and Multi-variate Analysis Techniques**

**- Supplementary data -**

Correspondence should be addressed to Ghiseok Kim; ghiseok@snu.ac.kr

I added supplementary tables S1 to S7 which show the parameters derived during multivariate algorithms such as PCR and PLSR. I also attached EXCEL file which include all data because the some table has 804 lines.

**Table S1: Loading matrix *P***

Each spectrum has 804 wavelengths from 904 to 1,707 nm, and we selected the number of principle components as 24 in the numerical process of PCR. Therefore, the loading matrix *P* used in equation (4) was determined 804 by 24 matrix. I added this *P* matrix partially (10 by 24 matrix) because it has 804 lines and I attached the EXCEL file which includes all data.

**Table S1** Loading matrix *P* calculated during PCR process.

**Table S2: Score matrix *T***

Because 82 spectra were used in the calibration process of PCR, and the number of principle components was selected as 24 as mentioned above, score matrix *T* used in equation (4) was determined 82 by 24 matrix. The score matrix *T* can be confirmed in the attached EXCEL file.

**Table S2** Score matrix *T* calculated during PCR process.

**Table S3: Beta matrix**

Through the PCR numerical process, we get the Beta matrix which was used in the final prediction. It is 805 by 1 matrix because each spectrum has 804 wavelengths plus one error term. I added this Beta matrix partially (only 20 by 1 matrix) because it has 805 lines and all data can be confirmed in the EXCEL file which attached.

**Table S3** Beta matrix calculated during PCR process.

**Table S4: Loading matrix *P***

In case of PLSR process, we can use much less number of principle components because the PLSR method use the reference values during its numerical process. Therefore, principle components was five and spectra has 804 wavelengths. *P* matrix in equation (5) was determined as 804 by 5 matrix, and I added this *P* matrix partially (10 by 24 matrix) and attached the EXCEL file which include all data of *P* matrix.

**Table S4** Loading matrix *P* for measured spectrum (X matrix) calculated during PLSR process.

**Table S5: Loading matrix *Q***

PLSR process include the reference value as *Y* matrix, while PCR don’t. Thus, we can get the loading matrix *Q* for the *Y* matrix during PLSR process as shown in table S5. It is 1 by 5 matrix because *Y* matrix has only one column, and the number of principle components is five.

**Table S5** Loading matrix *Q* for reference values (Y matrix) calculated during PLSR process.

**Table S6: Score matrix *T***

Because 82 spectrum was used in the calibration process of PLSR, and the number of principle components was selected as 5 as mentioned above, score matrix *T* used in equation (5) was determined 82 by 5 matrix as shown in table S6.

**Table S6** Score matrix *T* calculated during PLSR process.

**Table S7: Beta matrix**

Like the PCR process, we also get the Beta matrix which can be used in the final prediction through the PLSR numerical process. It is also 805 by 1 matrix because each spectra has 804 wavelengths plus one error term. I added this beta matrix partially (20 by 1 matrix) because it has 805 lines but all data can be confirmed in the attached EXCEL file.

**Table S7** Beta matrix calculated during PLSR process.
